# Supplementary material for: Exogenous TiO2 Nanoparticles Alleviate Cd Toxicity by Reducing Cd Uptake and Regulating Plant Physiological Activity and Antioxidant Defense Systems in Rice (Oryza sativa L.)
Source: MDPI journal article supplement (doi:10.3390/metabo13060765), 2023-06-19
Supplement: s1 [file s1]

**Table S1:** Soil chemical properties of the experimental soil prior to experimentation.

| Properties                                  | Contents |
|---------------------------------------------|----------|
| Organic matter (g kg <sup>-1</sup> )        | 20.78    |
| Total nitrogen (g kg <sup>-1</sup> )        | 1.16     |
| Total phosphorus (g kg <sup>-1</sup> )      | 0.99     |
| Total potassium (g kg <sup>-1</sup> )       | 18.85    |
| pH                                          | 5.87     |
| Available nitrogen (mg kg <sup>-1</sup> )   | 90.45    |
| Available phosphorus (mg kg <sup>-1</sup> ) | 9.49     |
| Available potassium (mg kg <sup>-1</sup> )  | 127.91   |
| Available molybdenum (mg kg <sup>-1</sup> ) | 0.081    |
| Cadmium (mg kg <sup>-1</sup> )              | 4.26     |

**Table S2:** Primer sequences used for qRT-PCR amplification

| Genes             | Strand  | 5' to 3' Primer Sequences | Annealing Temperature | Accession no.    |
|-------------------|---------|---------------------------|-----------------------|------------------|
| OsSO <sub>D</sub> | Forward | TGTCAACTGGACCACACTTC      | 58 °C                 | Os07g066520<br>0 |
|                   | Reverse | ACTTAAAACGCATGCACTC<br>A  |                       |                  |
| OsPO <sub>D</sub> | Forward | CGACGATTTCTACGACTACA<br>T | 59 °C                 | Os10g010960<br>0 |
|                   | Reverse | TGATTGAGGAGGTTCTGGT       |                       |                  |
| OsCA <sub>T</sub> | Forward | GCACAGTTTGACAGGGAG        | 55 °C                 | Os06g51150       |
|                   | Reverse | GTCTTTGGACTTGGCTTG        |                       |                  |
| OsAP <sub>X</sub> | Forward | TACGCCGACTTCTACCAGC       | 57 °C                 | Os07g069470<br>0 |
|                   | Reverse | TTTATTACAACCGCCACGA       |                       |                  |
| ACTI <sub>N</sub> | Forward | TGCCAAGGCTGAGTACGAC<br>GA | 58 °C                 | Os03g50885       |
|                   | Reverse | CAAGCAGGAGGACGGCGAT<br>A  |                       |                  |
